# Supplementary material for: Engineering a Humanised Niche to Support Human Haematopoiesis in Mice: Novel Opportunities in Modelling Cancer
Source: Cancers (Basel). 2020 Aug 6;12(8):2205. doi: 10.3390/cancers12082205 (PMC7466161; doi:10.3390/cancers12082205)
Supplement: Supplementary file 1 [file cancers-12-02205-s001.pdf]

# Engineering a Humanised Niche to Support Human Haematopoiesis in Mice: Novel Opportunities in Modelling Cancer

## Supplementary

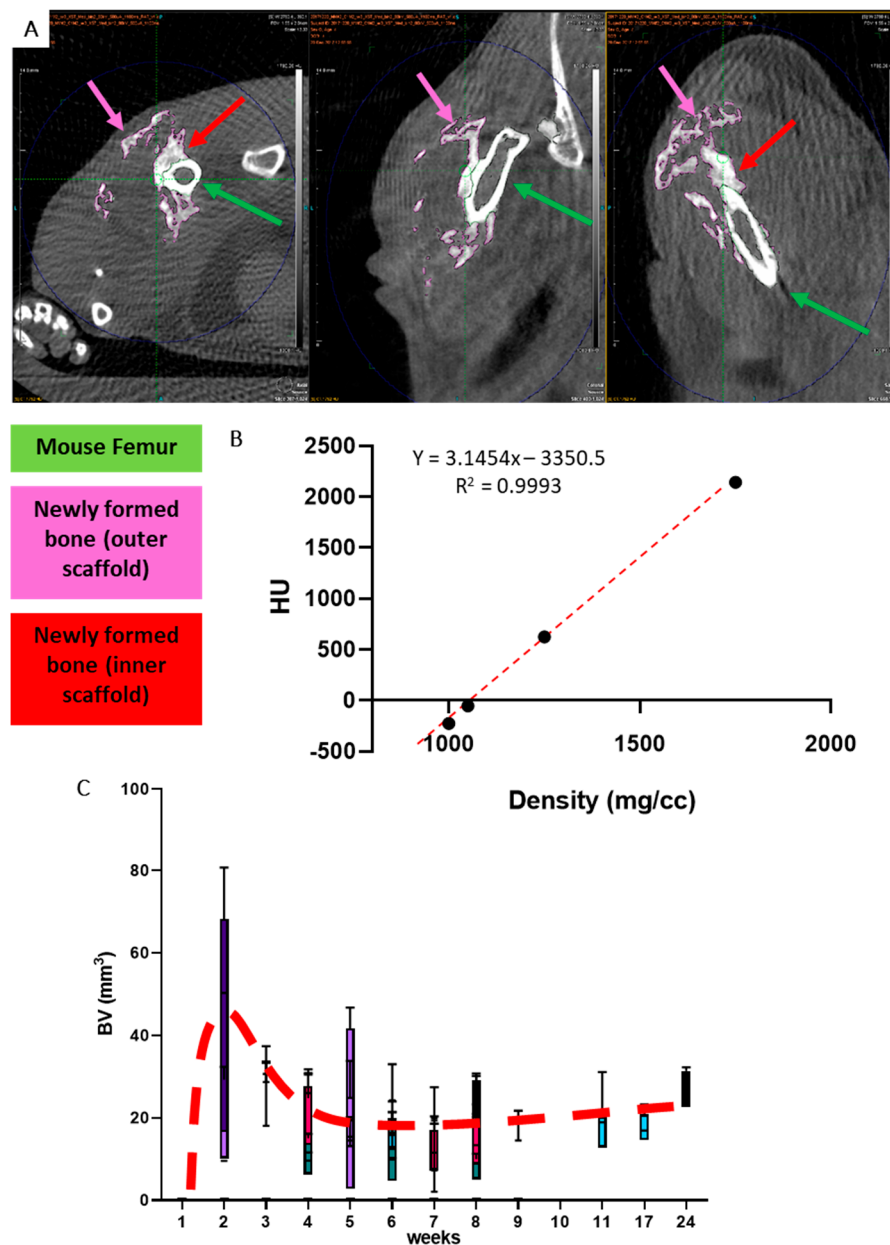

**Figure S1.** Analysis procedure of the *in vivo* CT scans and average values of bone formation. BV of the right femur (Green ROI) and scaffold (Pink ROI). Visualised with the Siemens Inveon Software [A]. Regression line to calculate BMD values from BV using a calibrated phantom [B]. Box plot showing the combined values of the scaffolds BV [C] of all patients implanted in the ohTEBC (n=41 mice).

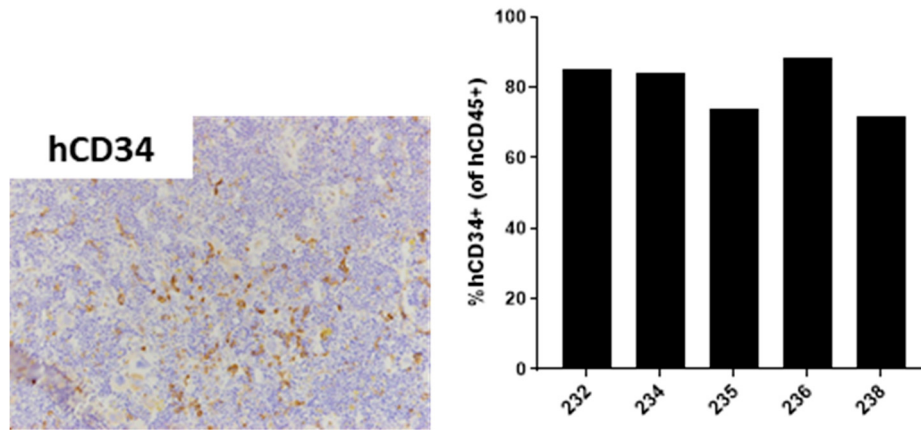

**Figure S2.** IHC showed hCD34 cells in the Spleen. Results were confirmed via Flow cytometry % of hCD34 cells detected shown as % of hCD45 cells.

**Table S1.** Details of the antibodies used for IHC, item number, and details for the IHC staining protocol; Working dilution, Incubation time and antigen retrieval method.

| Antibody                | Product #           | Species | Working Dilution | Incubation | Antigen Retrieval                        |
|-------------------------|---------------------|---------|------------------|------------|------------------------------------------|
| <b><u>hs-Col-1</u></b>  | Abcam (ab23446)     | Mouse   | 1:100            | o/n @ 4°C  | Proteinase K<br>15 min/RT                |
| <b><u>Lamin A/C</u></b> | Abcam<br>(ab108595) | Rabbit  | 1:300            | 1 hr @ RT  | EDTA Buffer,<br>pH 9.0, 95°C/ 5<br>min   |
| <b><u>NuMA</u></b>      | Abcam (ab97585)     | Rabbit  | 1:200            | 1 hr @ RT  | Sodium Citrate<br>pH 6.0, 95°C/ 5<br>min |
| <b><u>hCD45</u></b>     | Dako (M0701)        | Rabbit  | 1:300            | 1 hr @ RT  | Sodium Citrate<br>pH 6.0, 95°C/ 5<br>min |

**Table S2.** Conjugated antibodies used in flow cytometry experiments. All antibodies were used in the concentrations advised by the manufacturer.

|              | Fluorophore    | Clone  | REF                       |
|--------------|----------------|--------|---------------------------|
| <b>mCD45</b> | V500           | 30-F11 | BD-553081                 |
| <b>mCD45</b> | PE-Cy7         | 30-F11 | BD-552849                 |
| <b>hCD45</b> | Pacific Orange | HI30   | BD-560777                 |
| <b>hCD45</b> | APC            | HI30   | BD-555485                 |
| <b>hCD34</b> | PerCP-Cy5.5    | 8G12   | BD 347222                 |
| <b>hCD33</b> | APC            | P67.6  | BD 340474                 |
| <b>hCD19</b> | PE-Cy7         | J3-119 | Beckman Coulter<br>IM3628 |
| <b>hCD3</b>  | APC-H7         | SK7    | BD-641415                 |
| <b>hCD4</b>  | Pacific Blue   | RPA-T4 | BioLegend-300527          |
